# Supplementary material for: Examining measurement discrepancies in adolescent screen media activity with insights from the ABCD study
Source: Springer Nature journal article supplement (doi:10.1038/s44184-025-00131-z), 2025-05-10
Supplement: MOESM1 [file 44184_2025_131_MOESM1_ESM.pdf]

**A**

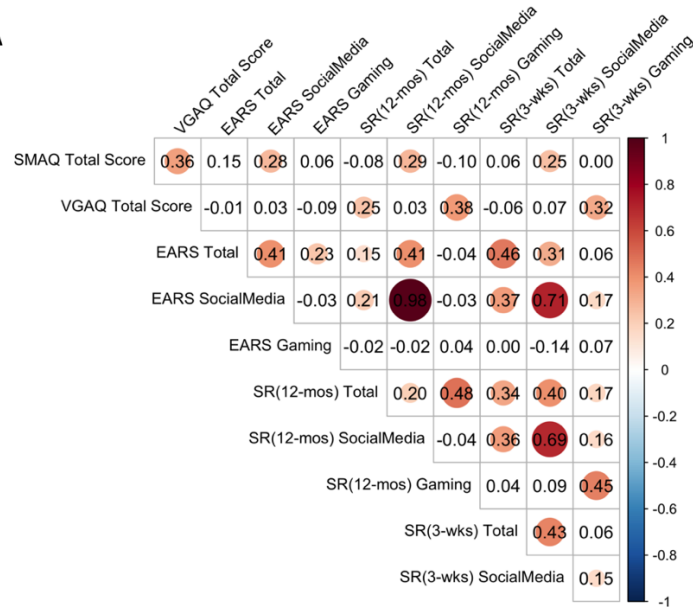

**B**

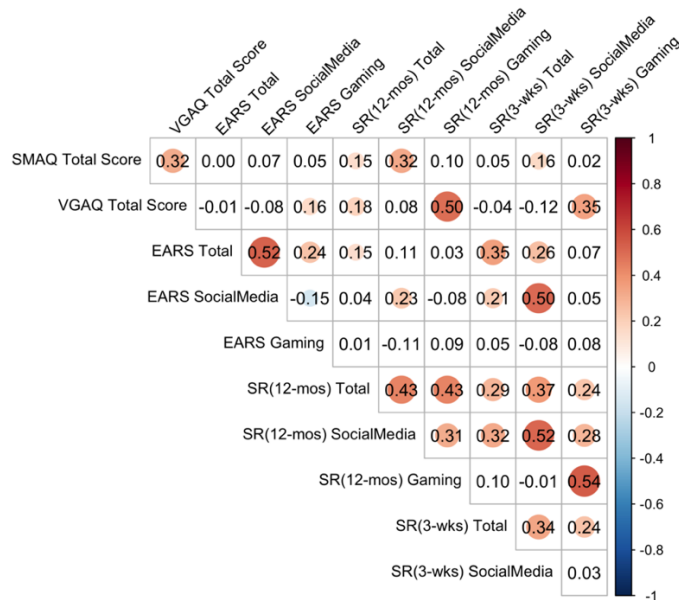

**Supplementary Figure 1.** Pairwise correlations among key SMA measures including self-reported screen time, EARS-related measures, and addiction scores are shown for (A) accurate and (B) biased-reporting groups. Each cell represents a correlation coefficient, with significant correlations highlighted by circles, where size and color indicate strength and direction. The accurate group includes participants with an objective-subjective discrepancy of  $\leq 30$  minutes, while the biased-reporting group includes those with a discrepancy  $>30$  minutes

Supplementary Table 1. Key social media and game apps used by participants with EARS app usage data<sup>1</sup>

| Social Media |             | Video Game                     |             |
|--------------|-------------|--------------------------------|-------------|
| App Title    | No. Users   | App Title                      | No. Users   |
| TikTok       | 279 (56.4%) | Google Play Games              | 134 (27.1%) |
| Instagram    | 256 (51.7%) | Roblox                         | 116 (23.4%) |
| Snapchat     | 228 (46.1%) | Among Us                       | 87 (17.6%)  |
| Facebook     | 105 (21.2%) | Pokémon GO                     | 65 (13.1%)  |
| Reddit       | 95 (19.2%)  | Clash Royale                   | 63 (12.7%)  |
| Twitter      | 92 (18.6%)  | Xbox                           | 58 (11.7%)  |
| sendit       | 18 (3.6%)   | Minecraft                      | 54 (10.9%)  |
| Tumblr       | 16 (3.2%)   | Clash of Clans                 | 52 (10.5%)  |
| BAND         | 11 (2.2%)   | Subway Surfers                 | 47 (9.5%)   |
|              |             | BitLife                        | 34 (6.9%)   |
|              |             | PlayStation App                | 29 (5.9%)   |
|              |             | Geometry Dash Lite             | 27 (5.5%)   |
|              |             | Magic Tiles 3                  | 23 (4.7%)   |
|              |             | Genshin Impact                 | 21 (4.2%)   |
|              |             | Brawl Stars                    | 21 (4.2%)   |
|              |             | Call of Duty Mobile Season 6   | 20 (4.0%)   |
|              |             | Meta Quest                     | 20 (4.0%)   |
|              |             | Gacha Club                     | 18 (3.6%)   |
|              |             | Egg, Inc.                      | 18 (3.6%)   |
|              |             | Cookie Run: Kingdom            | 17 (3.4%)   |
|              |             | Steam                          | 16 (3.2%)   |
|              |             | Bloons TD 6                    | 15 (3.0%)   |
|              |             | Solar Smash                    | 14 (2.8%)   |
|              |             | State.io                       | 13 (2.6%)   |
|              |             | Tomb of the Mask               | 12 (2.4%)   |
|              |             | Geometry Dash                  | 12 (2.4%)   |
|              |             | High Heels!                    | 12 (2.4%)   |
|              |             | WorldBox                       | 11 (2.2%)   |
|              |             | Retro Bowl                     | 11 (2.2%)   |
|              |             | Paint by Number: Coloring Game | 11 (2.2%)   |
|              |             | Plants vs. Zombies             | 10 (2.0%)   |
|              |             | Nonogram.com                   | 10 (2.0%)   |
|              |             | Episode                        | 10 (2.0%)   |
|              |             | Jetpack Joyride                | 10 (2.0%)   |
|              |             | MISTPLAY                       | 10 (2.0%)   |
|              |             | Obey Me!                       | 10 (2.0%)   |
|              |             | Crossy Road                    | 10 (2.02%)  |
|              |             | Dragon City Mobile             | 10 (2.02%)  |

<sup>1</sup>Key apps were defined as apps accessed by at least 10 individuals during the 3-week sensing period. EARS refers to the Effortless Assessment of Risk States app.

Supplementary Table 2: Subjective Measures

| Data Source                 |                                                  | Measures on a typical day | Original measures used for data processing                                                                                                                                                                                                                                       | Original Levels                                                                                                                                                                                                                                                                                                                                                                                                                                                             | Recode to Continuous Measures (Hrs)                |
|-----------------------------|--------------------------------------------------|---------------------------|----------------------------------------------------------------------------------------------------------------------------------------------------------------------------------------------------------------------------------------------------------------------------------|-----------------------------------------------------------------------------------------------------------------------------------------------------------------------------------------------------------------------------------------------------------------------------------------------------------------------------------------------------------------------------------------------------------------------------------------------------------------------------|----------------------------------------------------|
| SR <sup>1</sup><br>(3-wks)  | EARS - Post-Assessment Survey<br>(nt_y_ears_qtn) | Total                     | ears_post_6_y (wkdy);<br>ears_post_time_7_y (wknd)                                                                                                                                                                                                                               | 0 = 0   1 = 30 minutes   2 = 45 minutes   3 = 1 hour   4 = 1.5 hours   5 = 2 hours   6 = 2.5 hours   7 = 3 hours   8 = 4 hours   9 = 5 hours   10 = 6 hours   11 = 7 hours   12 = 8 hours   13 = 9 hours   14 = 10 hours   15 = 11 hours   16 = 12 hours   17 = 13 hours   18 = 14 hours   19 = 15 hours   20 = 16 hours   21 = 17 hours   22 = 18 hours   23 = 19 hours   24 = 20 hours   25 = 21 hours   26 = 22 hours   27 = 23 hours   28 = 24 hours   999 = Don't know | 0, 0.5, 0.75, 1, 1.5, 2, 2.5, 3-24                 |
|                             |                                                  | Social Media              | ears_post_3_y (wkdy);<br>ears_post_time_4_y (wknd)                                                                                                                                                                                                                               |                                                                                                                                                                                                                                                                                                                                                                                                                                                                             |                                                    |
|                             |                                                  | Gaming                    | single-player video games: ears_post_y (wkdy); ears_post_time_1_y (wknd)<br>multiplayer video games: ears_post_1_y (wkdy); ears_post_time_2_y (wknd)                                                                                                                             |                                                                                                                                                                                                                                                                                                                                                                                                                                                                             |                                                    |
|                             |                                                  |                           |                                                                                                                                                                                                                                                                                  |                                                                                                                                                                                                                                                                                                                                                                                                                                                                             |                                                    |
| SR <sup>1</sup><br>(12-mos) | Screen Time Questionnaire<br>(nt_y_st)           | Total                     | screentime_wkdy_typical_hr + screentime_wkdy_typical_min (wkdy);<br>screentime_wknd_typical_hr + screentime_wknd_t_min (wknd)                                                                                                                                                    |                                                                                                                                                                                                                                                                                                                                                                                                                                                                             | 0, 0.25, 0.5, 0.75, 1, 1.25, 1.5, 1.75, ..., 23.75 |
|                             |                                                  | Social Media              | screentime_6_wkdy_hr + screentime_6_wkdy_min (wkdy);<br>screentime_7_wkdy_hr + screentime_7_wkdy_min (wknd)                                                                                                                                                                      | hr: 0=0; 1=1; 2=2; 3=3; 4=4; 5=5; 6=6; 7=7; 8=8; 9=9; 10=10; 11=11; 12=12; 13=13; 14=14; 15=15; 16=16; 17=17; 18=18; 19=19; 20=20; 21=21; 22=22; 23=23<br>min: 0=0; 15=15; 30=30; 45=45                                                                                                                                                                                                                                                                                     |                                                    |
|                             |                                                  | Gaming                    | single-player video games: screentime_3_wkdy_hr + screentime_3_wkdy_min (wkdy);<br>screentime_9_wknd_hr + screentime_9_wknd_min (wknd)<br>multiplayer video games: screentime_4_wkdy_hr + screentime_4_wkdy_min (wkdy);<br>screentime_10_wknd_hr + screentime_10_wknd_min (wknd) |                                                                                                                                                                                                                                                                                                                                                                                                                                                                             |                                                    |
|                             |                                                  |                           |                                                                                                                                                                                                                                                                                  |                                                                                                                                                                                                                                                                                                                                                                                                                                                                             |                                                    |

<sup>1</sup>SR=self-report; SR (3-wks) means post-sensing self-report data; SR (12-mos) means past-year self-report data

Supplementary Table 3. Top 20 apps ranked by average daily app usage per participant

| App Title                | Average Daily App Usage across all 495 participants | Average Daily App Usage across participants with nonzero app usage <sup>1</sup> | No. Users (%) | Categories <sup>2</sup> |
|--------------------------|-----------------------------------------------------|---------------------------------------------------------------------------------|---------------|-------------------------|
| YouTube                  | 64.57                                               | 72.31                                                                           | 442 (89.29%)  | Video Players           |
| TikTok                   | 60.33                                               | 107.03                                                                          | 279 (56.36%)  | Social                  |
| Snapchat                 | 17.79                                               | 38.62                                                                           | 228 (46.06%)  | Social                  |
| Instagram                | 16.95                                               | 32.77                                                                           | 256 (51.72%)  | Social                  |
| Google Chrome            | 14.07                                               | 14.60                                                                           | 477 (96.36%)  | Communication           |
| Discord                  | 9.29                                                | 18.63                                                                           | 247 (49.9%)   | Communication           |
| Netflix                  | 7.49                                                | 21.94                                                                           | 169 (34.14%)  | Video Players           |
| Wattpad                  | 4.19                                                | 53.14                                                                           | 39 (7.88%)    | Books & Reference       |
| Samsung One UI Home      | 3.60                                                | 7.05                                                                            | 253 (51.11%)  | Personalization         |
| Clock                    | 2.92                                                | 4.45                                                                            | 325 (65.66%)  | Tools                   |
| Google                   | 2.77                                                | 3.02                                                                            | 455 (91.92%)  | Tools                   |
| WEBTOON                  | 2.42                                                | 16.60                                                                           | 72 (14.55%)   | Comics                  |
| Twitch                   | 2.30                                                | 9.98                                                                            | 114 (23.03%)  | Video Players           |
| YouTube Music            | 2.29                                                | 10.78                                                                           | 105 (21.21%)  | Music & Audio           |
| Samsung Internet Browser | 2.24                                                | 10.09                                                                           | 110 (22.22%)  | Communication           |
| Spotify                  | 2.23                                                | 4.14                                                                            | 267 (53.94%)  | Music & Audio           |
| Hulu                     | 2.19                                                | 20.04                                                                           | 54 (10.91%)   | Video Players           |
| Reddit                   | 2.17                                                | 11.32                                                                           | 95 (19.19%)   | Social                  |
| Minecraft                | 2.02                                                | 18.48                                                                           | 54 (10.91%)   | Game                    |
| Disney+                  | 1.97                                                | 10.49                                                                           | 93 (18.79%)   | Video Players           |

<sup>1</sup>Average daily app usage for each app was calculated as total app usage divided by the number of individuals who had nonzero app usage data for that app during the 3-week passive sensing period.

<sup>2</sup>App categories were defined by Google Play except that Snapchat was defined as social media apps in this investigation.

Supplementary Table 4a. Multinomial logistic regression models testing associations between NIH Toolbox Picture Sequence Memory and accurate- and over-reporting of social media use

|                                                   | Cutoff=0.5hr             |         | Cutoff=1hr              |         |
|---------------------------------------------------|--------------------------|---------|-------------------------|---------|
|                                                   | Accurate: 222; over: 105 |         | Accurate: 289; over: 69 |         |
|                                                   | OR [95%CI]               | p-value | OR [95%CI]              | p-value |
| Picture Sequence Memory                           | 0.99 [0.98-1.01]         | 0.332   | 1.00 [0.98-1.02]        | 0.951   |
| Age (yrs)                                         | 1.18 [0.83-1.68]         | 0.358   | 1.15 [0.78-1.71]        | 0.486   |
| Sex at Birth (Ref: Male)                          |                          |         |                         |         |
| Female                                            | 1.14 [0.69-1.89]         | 0.606   | 1.08 [0.62-1.90]        | 0.782   |
| Race Ethnicity (Ref: White)                       |                          |         |                         |         |
| Black                                             | 3.60 [1.36-9.54]         | 0.010   | 3.47 [1.35-8.91]        | 0.010   |
| Hispanic                                          | 0.96 [0.47-1.94]         | 0.904   | 1.39 [0.63-3.05]        | 0.412   |
| Other                                             | 0.62 [0.28-1.38]         | 0.242   | 0.82 [0.33-2.00]        | 0.660   |
| Family Income (US\$)<br>(Ref: [>100k])            |                          |         |                         |         |
| [50-100k]                                         | 0.71 [0.37-1.34]         | 0.292   | 0.70 [0.33-1.46]        | 0.340   |
| [<50k]                                            | 0.75 [0.32-1.78]         | 0.517   | 0.70 [0.27-1.81]        | 0.456   |
| Parental Education<br>(Ref: Post Graduate Degree) |                          |         |                         |         |
| Bachelor                                          | 1.11 [0.59-2.10]         | 0.747   | 0.74 [0.35-1.55]        | 0.420   |
| Some College                                      | 1.41 [0.67-2.99]         | 0.370   | 1.17 [0.52-2.65]        | 0.708   |
| High School or Below                              | 1.54 [0.59-4.06]         | 0.380   | 1.13 [0.39-3.25]        | 0.827   |
| Parental Marital (Ref: Married)                   |                          |         |                         |         |
| Not Married                                       | 2.24 [1.25-4.02]         | 0.007   | 1.63 [0.85-3.13]        | 0.141   |

Supplementary Table 4b. Multinomial logistic regression models testing associations between NIH Toolbox Picture Sequence Memory and accurate- and under-reporting of social media use

|                                 | Cutoff=0.5hr              |         | Cutoff=1hr                |         |
|---------------------------------|---------------------------|---------|---------------------------|---------|
|                                 | Accurate: 222; under: 144 |         | Accurate: 289; under: 113 |         |
|                                 | OR [95%CI]                | p-value | OR [95%CI]                | p-value |
| Picture Sequence Memory         | 0.99 [0.98-1.01]          | 0.477   | 1.00 [0.98-1.01]          | 0.708   |
| Age (yrs)                       | 1.31 [0.95-1.80]          | 0.098   | 1.32 [0.95-1.83]          | 0.098   |
| Sex at Birth (Ref: Male)        |                           |         |                           |         |
| Female                          | 1.21 [0.77-1.89]          | 0.407   | 1.15 [0.73-1.83]          | 0.541   |
| Race Ethnicity (Ref: White)     |                           |         |                           |         |
| Black                           | 2.64 [1.03-6.79]          | 0.043   | 1.83 [0.78-4.30]          | 0.166   |
| Hispanic                        | 1.42 [0.79-2.58]          | 0.245   | 1.80 [0.99-3.27]          | 0.052   |
| Other                           | 0.76 [0.38-1.51]          | 0.431   | 0.74 [0.34-1.59]          | 0.434   |
| Family Income (US\$)            |                           |         |                           |         |
| (Ref: [>100k])                  |                           |         |                           |         |
| [50-100k]                       | 0.68 [0.38-1.21]          | 0.191   | 0.91 [0.50-1.67]          | 0.771   |
| [<50k]                          | 1.06 [0.50-2.24]          | 0.880   | 1.13 [0.52-2.43]          | 0.754   |
| Parental Education              |                           |         |                           |         |
| (Ref: Post Graduate Degree)     |                           |         |                           |         |
| Bachelor                        | 1.20 [0.67-2.17]          | 0.542   | 1.20 [0.64-2.25]          | 0.566   |
| Some College                    | 1.99 [1.01-3.91]          | 0.047   | 1.61 [0.79-3.27]          | 0.186   |
| High School or Below            | 1.62 [0.66-3.93]          | 0.291   | 1.66 [0.68-4.03]          | 0.265   |
| Parental Marital (Ref: Married) |                           |         |                           |         |
| Not Married                     | 1.51 [0.88-2.60]          | 0.134   | 1.12 [0.65-1.93]          | 0.682   |

Supplementary Table 5a. Multinomial logistic regression models testing associations between NIH Toolbox List Sorting Working Memory and accurate- and over-reporting of social media use

|                                 | Cutoff=0.5hr             |         | Cutoff=1hr              |         |
|---------------------------------|--------------------------|---------|-------------------------|---------|
|                                 | Accurate: 221; over: 105 |         | Accurate: 288; over: 69 |         |
|                                 | OR [95%CI]               | p-value | OR [95%CI]              | p-value |
| List Sorting Working Memory     | 0.98 [0.96-1.00]         | 0.028   | 0.99 [0.96-1.01]        | 0.164   |
| Age (yrs)                       | 1.21 [0.85-1.73]         | 0.294   | 1.18 [0.79-1.76]        | 0.421   |
| Sex at Birth (Ref: Male)        |                          |         |                         |         |
| Female                          | 1.13 [0.68-1.86]         | 0.644   | 1.10 [0.63-1.93]        | 0.733   |
| Race Ethnicity (Ref: White)     |                          |         |                         |         |
| Black                           | 3.09 [1.16-8.25]         | 0.024   | 2.96 [1.14-7.66]        | 0.026   |
| Hispanic                        | 0.91 [0.45-1.84]         | 0.796   | 1.35 [0.62-2.96]        | 0.447   |
| Other                           | 0.63 [0.28-1.38]         | 0.249   | 0.80 [0.33-1.96]        | 0.628   |
| Family Income (US\$)            |                          |         |                         |         |
| (Ref: [>100k])                  |                          |         |                         |         |
| [50-100k]                       | 0.75 [0.39-1.42]         | 0.372   | 0.72 [0.35-1.51]        | 0.389   |
| [<50k]                          | 0.77 [0.32-1.81]         | 0.542   | 0.70 [0.27-1.82]        | 0.465   |
| Parental Education              |                          |         |                         |         |
| (Ref: Post Graduate Degree)     |                          |         |                         |         |
| Bachelor                        | 1.01 [0.53-1.93]         | 0.972   | 0.68 [0.32-1.43]        | 0.305   |
| Some College                    | 1.26 [0.59-2.70]         | 0.548   | 1.05 [0.46-2.40]        | 0.905   |
| High School or Below            | 1.35 [0.51-3.58]         | 0.547   | 1.00 [0.34-2.90]        | 0.995   |
| Parental Marital (Ref: Married) |                          |         |                         |         |
| Not Married                     | 2.36 [1.31-4.26]         | 0.004   | 1.67 [0.87-3.21]        | 0.123   |

Supplementary Table 5b. Multinomial logistic regression models testing associations between NIH Toolbox List Sorting Working Memory and accurate- and under-reporting of social media use

|                                 | Cutoff=0.5hr              |         | Cutoff=1hr                |         |
|---------------------------------|---------------------------|---------|---------------------------|---------|
|                                 | Accurate: 221; under: 145 |         | Accurate: 288; under: 114 |         |
|                                 | OR [95%CI]                | p-value | OR [95%CI]                | p-value |
| List Sorting Working Memory     | 0.99 [0.97-1.01]          | 0.323   | 1.00 [0.98-1.02]          | 0.892   |
| Age (yrs)                       | 1.33 [0.97-1.83]          | 0.081   | 1.33 [0.96-1.85]          | 0.088   |
| Sex at Birth (Ref: Male)        |                           |         |                           |         |
| Female                          | 1.17 [0.75-1.83]          | 0.483   | 1.13 [0.71-1.78]          | 0.611   |
| Race Ethnicity (Ref: White)     |                           |         |                           |         |
| Black                           | 2.47 [0.96-6.37]          | 0.061   | 1.80 [0.76-4.27]          | 0.179   |
| Hispanic                        | 1.34 [0.74-2.43]          | 0.332   | 1.73 [0.96-3.14]          | 0.070   |
| Other                           | 0.76 [0.38-1.50]          | 0.425   | 0.73 [0.34-1.57]          | 0.423   |
| Family Income (US\$)            |                           |         |                           |         |
| (Ref: [>100k])                  |                           |         |                           |         |
| [50-100k]                       | 0.71 [0.40-1.27]          | 0.251   | 0.95 [0.52-1.73]          | 0.865   |
| [<50k]                          | 1.06 [0.50-2.24]          | 0.886   | 1.13 [0.52-2.43]          | 0.762   |
| Parental Education              |                           |         |                           |         |
| (Ref: Post Graduate Degree)     |                           |         |                           |         |
| Bachelor                        | 1.16 [0.64-2.10]          | 0.624   | 1.20 [0.64-2.25]          | 0.576   |
| Some College                    | 1.93 [0.98-3.82]          | 0.059   | 1.62 [0.80-3.31]          | 0.182   |
| High School or Below            | 1.66 [0.69-4.03]          | 0.261   | 1.78 [0.74-4.33]          | 0.199   |
| Parental Marital (Ref: Married) |                           |         |                           |         |
| Not Married                     | 1.54 [0.90-2.66]          | 0.117   | 1.11 [0.65-1.93]          | 0.696   |



Supplementary Table 6a. Multinomial logistic regression models testing associations between NIH Toolbox Oral Reading Recognition and accurate- and over-reporting of social media use

|                                                   | Cutoff=0.5hr             |         | Cutoff=1hr              |         |
|---------------------------------------------------|--------------------------|---------|-------------------------|---------|
|                                                   | Accurate: 221; over: 106 |         | Accurate: 289; over: 69 |         |
|                                                   | OR [95%CI]               | p-value | OR [95%CI]              | p-value |
| Oral Reading Recognition                          | 0.98 [0.95-1.02]         | 0.354   | 0.98 [0.94-1.02]        | 0.246   |
| Age (yrs)                                         | 1.21 [0.85-1.73]         | 0.278   | 1.18 [0.80-1.76]        | 0.405   |
| Sex at Birth (Ref: Male)                          |                          |         |                         |         |
| Female                                            | 1.11 [0.68-1.83]         | 0.676   | 1.11 [0.64-1.95]        | 0.710   |
| Race Ethnicity (Ref: White)                       |                          |         |                         |         |
| Black                                             | 3.47 [1.30-9.27]         | 0.013   | 3.03 [1.17-7.87]        | 0.022   |
| Hispanic                                          | 0.91 [0.45-1.84]         | 0.789   | 1.36 [0.62-2.97]        | 0.449   |
| Other                                             | 0.64 [0.29-1.41]         | 0.271   | 0.83 [0.34-2.04]        | 0.686   |
| Family Income (US\$)<br>(Ref: [>100k])            |                          |         |                         |         |
| [50-100k]                                         | 0.77 [0.41-1.46]         | 0.425   | 0.71 [0.34-1.50]        | 0.370   |
| [<50k]                                            | 0.79 [0.34-1.87]         | 0.598   | 0.70 [0.27-1.84]        | 0.471   |
| Parental Education<br>(Ref: Post Graduate Degree) |                          |         |                         |         |
| Bachelor                                          | 1.14 [0.61-2.16]         | 0.678   | 0.72 [0.34-1.50]        | 0.375   |
| Some College                                      | 1.36 [0.64-2.88]         | 0.429   | 1.08 [0.47-2.47]        | 0.851   |
| High School or Below                              | 1.49 [0.56-3.92]         | 0.423   | 1.01 [0.34-2.97]        | 0.987   |
| Parental Marital (Ref: Married)                   |                          |         |                         |         |
| Not Married                                       | 2.27 [1.26-4.09]         | 0.006   | 1.69 [0.88-3.27]        | 0.116   |

Supplementary Table 6b. Multinomial logistic regression models testing associations between NIH Toolbox Oral Reading Recognition and accurate- and under-reporting of social media use

|                                                   | Cutoff=0.5hr              |         | Cutoff=1hr                |         |
|---------------------------------------------------|---------------------------|---------|---------------------------|---------|
|                                                   | Accurate: 221; under: 145 |         | Accurate: 289; under: 114 |         |
|                                                   | OR [95%CI]                | p-value | OR [95%CI]                | p-value |
| Oral Reading Recognition                          | 0.98 [0.94-1.01]          | 0.152   | 0.97 [0.94-1.01]          | 0.154   |
| Age (yrs)                                         | 1.36 [0.99-1.87]          | 0.059   | 1.37 [0.99-1.90]          | 0.061   |
| Sex at Birth (Ref: Male)                          |                           |         |                           |         |
| Female                                            | 1.20 [0.77-1.88]          | 0.426   | 1.15 [0.73-1.82]          | 0.543   |
| Race Ethnicity (Ref: White)                       |                           |         |                           |         |
| Black                                             | 2.39 [0.92-6.19]          | 0.072   | 1.61 [0.68-3.83]          | 0.279   |
| Hispanic                                          | 1.33 [0.73-2.41]          | 0.347   | 1.70 [0.94-3.08]          | 0.081   |
| Other                                             | 0.78 [0.39-1.54]          | 0.469   | 0.75 [0.35-1.60]          | 0.452   |
| Family Income (US\$)<br>(Ref: [>100k])            |                           |         |                           |         |
| [50-100k]                                         | 0.72 [0.40-1.28]          | 0.265   | 0.95 [0.52-1.73]          | 0.870   |
| [<50k]                                            | 1.07 [0.51-2.28]          | 0.854   | 1.13 [0.52-2.43]          | 0.763   |
| Parental Education<br>(Ref: Post Graduate Degree) |                           |         |                           |         |
| Bachelor                                          | 1.19 [0.66-2.16]          | 0.557   | 1.18 [0.63-2.20]          | 0.613   |
| Some College                                      | 1.89 [0.96-3.74]          | 0.066   | 1.53 [0.75-3.12]          | 0.242   |
| High School or Below                              | 1.60 [0.66-3.90]          | 0.300   | 1.63 [0.67-3.98]          | 0.284   |
| Parental Marital (Ref: Married)                   |                           |         |                           |         |
| Not Married                                       | 1.55 [0.90-2.67]          | 0.115   | 1.15 [0.66-1.99]          | 0.619   |

Supplementary Table 7a. Multinomial logistic regression models testing associations between NIH Toolbox Picture Vocabulary and accurate- and over-reporting of social media use with pubertal development stages as covariate

|                                 | Cutoff=0.5hr             |         | Cutoff=1hr              |         |
|---------------------------------|--------------------------|---------|-------------------------|---------|
|                                 | Accurate: 221; over: 105 |         | Accurate: 289; over: 68 |         |
|                                 | OR [95%CI]               | p-value | OR [95%CI]              | p-value |
| Picture Vocabulary              | 0.97 [0.94-1.01]         | 0.114   | 0.97 [0.94-1.01]        | 0.173   |
| Age (yrs)                       | 1.16 [0.80-1.68]         | 0.426   | 1.18 [0.78-1.79]        | 0.433   |
| Sex at Birth (Ref: Male)        |                          |         |                         |         |
| Female                          | 0.95 [0.54-1.68]         | 0.866   | 1.00 [0.53-1.89]        | 0.992   |
| Race Ethnicity (Ref: White)     |                          |         |                         |         |
| Black                           | 3.22 [1.19-8.73]         | 0.021   | 3.02 [1.14-8.03]        | 0.026   |
| Hispanic                        | 0.84 [0.41-1.73]         | 0.638   | 1.33 [0.60-2.96]        | 0.484   |
| Other                           | 0.63 [0.29-1.40]         | 0.258   | 0.81 [0.33-2.00]        | 0.648   |
| Family Income (US\$)            |                          |         |                         |         |
| (Ref: [>100k])                  |                          |         |                         |         |
| [50-100k]                       | 0.66 [0.34-1.25]         | 0.202   | 0.60 [0.28-1.27]        | 0.181   |
| [<50k]                          | 0.68 [0.29-1.63]         | 0.392   | 0.60 [0.23-1.59]        | 0.309   |
| Parental Education              |                          |         |                         |         |
| (Ref: Post Graduate Degree)     |                          |         |                         |         |
| Bachelor                        | 1.15 [0.60-2.20]         | 0.664   | 0.67 [0.32-1.43]        | 0.305   |
| Some College                    | 1.29 [0.60-2.80]         | 0.514   | 1.09 [0.47-2.52]        | 0.843   |
| High School or Below            | 1.54 [0.57-4.15]         | 0.394   | 1.02 [0.34-3.03]        | 0.975   |
| Parental Marital (Ref: Married) |                          |         |                         |         |
| Not Married                     | 2.33 [1.29-4.21]         | 0.005   | 1.71 [0.88-3.29]        | 0.111   |
| Pubertal Development            |                          |         |                         |         |
| (Ref: Late or Post Puberty)     |                          |         |                         |         |
| Mid Puberty                     | 0.90 [0.49-1.64]         | 0.722   | 0.79 [0.40-1.56]        | 0.492   |
| Pre- or Early Puberty           | 0.27 [0.08-0.93]         | 0.038   | 0.63 [0.18-2.15]        | 0.459   |

Supplementary Table 7b. Multinomial logistic regression models testing associations between NIH Toolbox Picture Vocabulary and accurate- and under-reporting of social media use with pubertal development stages as covariate

|                                 | Cutoff=0.5hr              |         | Cutoff=1hr                |         |
|---------------------------------|---------------------------|---------|---------------------------|---------|
|                                 | Accurate: 221; under: 144 |         | Accurate: 289; under: 113 |         |
|                                 | OR [95%CI]                | p-value | OR [95%CI]                | p-value |
| Picture Vocabulary              | 0.96 [0.93-0.99]          | 0.007   | 0.96 [0.93-0.99]          | 0.007   |
| Age (yrs)                       | 1.42 [1.02-1.98]          | 0.039   | 1.52 [1.08-2.15]          | 0.017   |
| Sex at Birth (Ref: Male)        |                           |         |                           |         |
| Female                          | 1.14 [0.68-1.92]          | 0.625   | 1.30 [0.76-2.24]          | 0.340   |
| Race Ethnicity (Ref: White)     |                           |         |                           |         |
| Black                           | 2.07 [0.79-5.44]          | 0.141   | 1.36 [0.56-3.31]          | 0.498   |
| Hispanic                        | 1.25 [0.68-2.30]          | 0.465   | 1.64 [0.89-3.02]          | 0.112   |
| Other                           | 0.75 [0.37-1.50]          | 0.410   | 0.72 [0.33-1.56]          | 0.406   |
| Family Income (US\$)            |                           |         |                           |         |
| (Ref: [>100k])                  |                           |         |                           |         |
| [50-100k]                       | 0.64 [0.36-1.16]          | 0.143   | 0.91 [0.49-1.68]          | 0.759   |
| [<50k]                          | 0.98 [0.46-2.10]          | 0.962   | 1.09 [0.50-2.37]          | 0.832   |
| Parental Education              |                           |         |                           |         |
| (Ref: Post Graduate Degree)     |                           |         |                           |         |
| Bachelor                        | 1.15 [0.63-2.10]          | 0.643   | 1.10 [0.58-2.07]          | 0.775   |
| Some College                    | 1.70 [0.85-3.41]          | 0.131   | 1.35 [0.66-2.79]          | 0.412   |
| High School or Below            | 1.30 [0.52-3.26]          | 0.571   | 1.25 [0.50-3.15]          | 0.632   |
| Parental Marital (Ref: Married) |                           |         |                           |         |
| Not Married                     | 1.60 [0.93-2.77]          | 0.092   | 1.18 [0.68-2.05]          | 0.558   |
| Pubertal Development            |                           |         |                           |         |
| (Ref: Late or Post Puberty)     |                           |         |                           |         |
| Mid Puberty                     | 0.90 [0.51-1.58]          | 0.712   | 1.13 [0.64-2.02]          | 0.673   |
| Pre- or Early Puberty           | 0.88 [0.37-2.10]          | 0.773   | 1.73 [0.71-4.20]          | 0.227   |
